# Supplementary material for: High-fidelity detection of picric acid following proton prompted fluorescence quenching by a novel acridine yellow G-based binuclear ZnII-metallacycle
Source: Royal Society of Chemistry journal article supplement (doi:10.1039/d3nj05688k), 2024-01-01
Supplement: d3nj05688k1.pdf [file d3nj05688k1.pdf]

## Electronic Supplementary Information (ESI)

### High-fidelity detection of Picric acid following proton prompted fluorescence quenching by a novel acridine yellow G based binuclear Zn<sup>II</sup>-metallacycle

Prem Chand and Ashish Kumar\*

Department of Chemistry, Institute of science, Banaras Hindu University, Varanasi – 221005

U. P., India. *E-mail:* [akumar.chem@bhu.ac.in](mailto:akumar.chem@bhu.ac.in).

| S. No. | Figures        | Page No. |
|--------|----------------|----------|
| 1      | Fig. S1        | 2        |
| 2      | Fig. S2        | 3        |
| 3      | Fig. S3 & S4   | 4-5      |
| 4      | Fig. S5 & S6   | 6-7      |
| 5      | Fig. S7        | 8        |
| 6      | Fig. S8        | 9        |
| 7      | Fig. S9 & S10  | 10       |
| 9      | Fig. S11       | 11       |
| 10     | Fig. S12       | 12       |
| 11     | Fig. S13       | 12       |
| 12     | Fig.S14        | 13       |
| 13     | Fig. S15 & S16 | 14       |
| 14     | Fig. S17       | 14       |
| 15     | Fig. S18 & S19 | 15       |
| 16     | Fig. S20 & S21 | 16       |
| 17     | Fig. S22       | 17       |
| 18     | Fig. S23       | 18       |
| 19     | Fig. S24 & S25 | 19       |
| 20     | Fig. S26 & S27 | 20       |
| 21     | Table T1-T3    | 21-23    |
| 22     | Table T4       | 24       |
| 23     | References     | 25       |

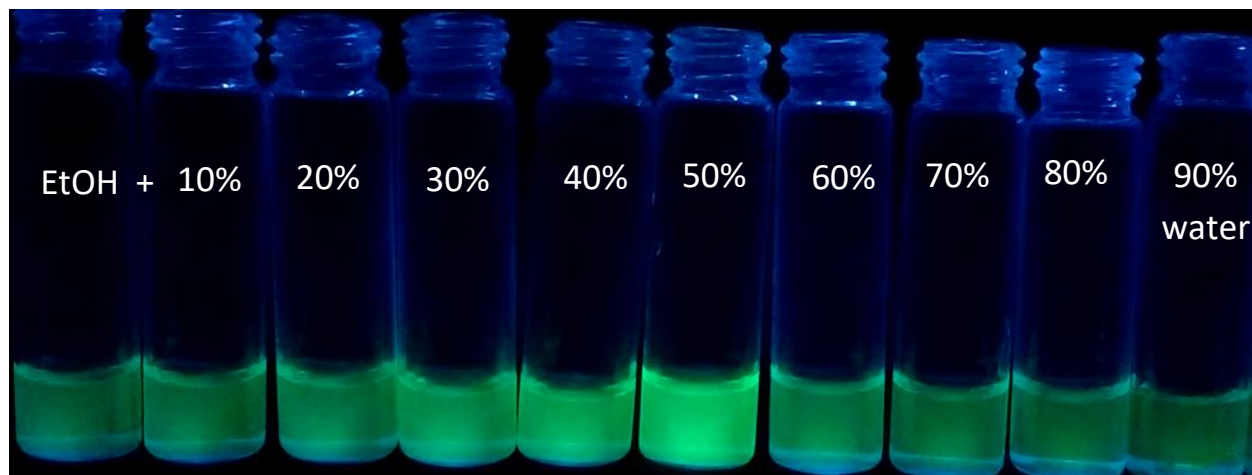

**Fig. S1** Display of fluorescence for complex **1** in EtOH/H<sub>2</sub>O mixture with increasing % ratio of H<sub>2</sub>O in EtOH from 0 to 90% which showed maximum fluorescence in 50% EtOH/H<sub>2</sub>O ratio.

#### Determination of quantum yield:

Quantum yields for **H<sub>2</sub>L**, **H<sub>2</sub>L<sub>M</sub>**, **1** and **2** were determined by using quinine sulphate ( $\Phi = 0.54$ , 1 M H<sub>2</sub>SO<sub>4</sub>) as an internal standard in aqueous ethanolic solution (c,  $1.0 \times 10^{-5}$  M: v/v, 1/1) according to the following equation<sup>1-2</sup>:

$$Q = Q_R \cdot I/I_R \cdot OD_R/OD \cdot \eta^2/\eta_R^2$$

Where,  $Q_R$  = quantum yield of reference

$I$  = fluorescence intensity area of probe

$I_R$  = fluorescence intensity area of reference

$OD_R$  = optical density of reference

$OD$  = optical density of probe

$\eta_R^2$  and  $\eta^2$  are refractive indices of used solutions for reference and probe (EtOH:H<sub>2</sub>O)

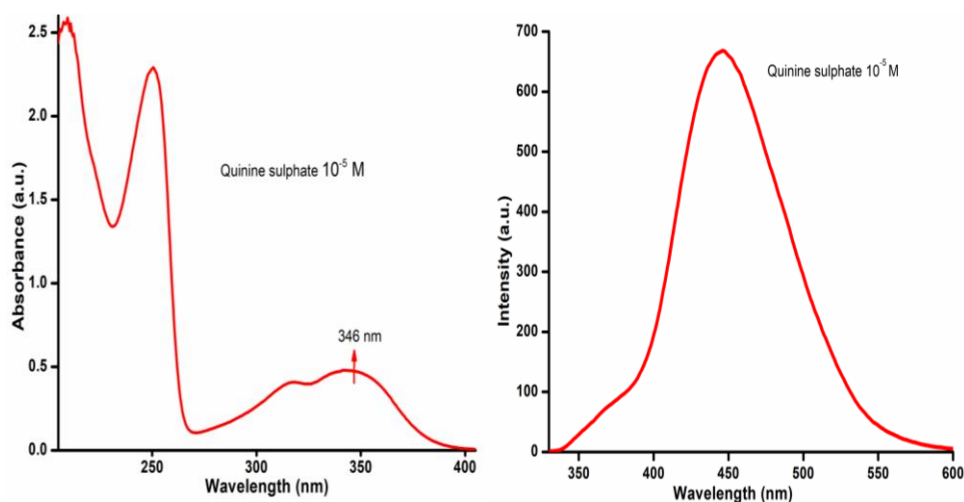

**Fig. S2** Absorption and fluorescence spectra for quinine-sulfate recorded in aqueous ethanolic solution of EtOH:H<sub>2</sub>O (c,  $1.0 \times 10^{-5}$  M, v/v) which was used as a internal reference for calculation of quantum yield for ligand (H<sub>2</sub>L, H<sub>2</sub>L<sub>M</sub>) and complex (**1**, **2**).

**Formulation for percentage fluorescence quenching:**

% fluorescence quenching of **1** in presence of all NACs were calculated by using following method.<sup>3-4</sup>

$$\text{Quenching} = (I_0 - I) / I_0 \times 100 \%$$

Where,  $I_0$  = Initial fluorescence intensity of **1** in absence of PA

$I$  = Intensity of **1** in presence of PA.

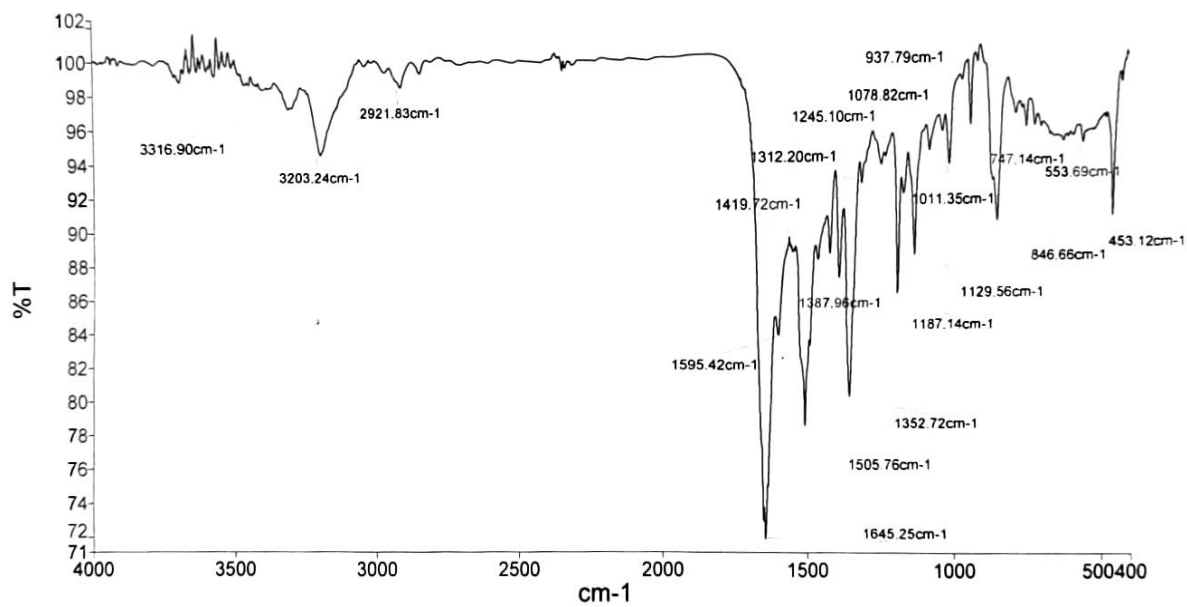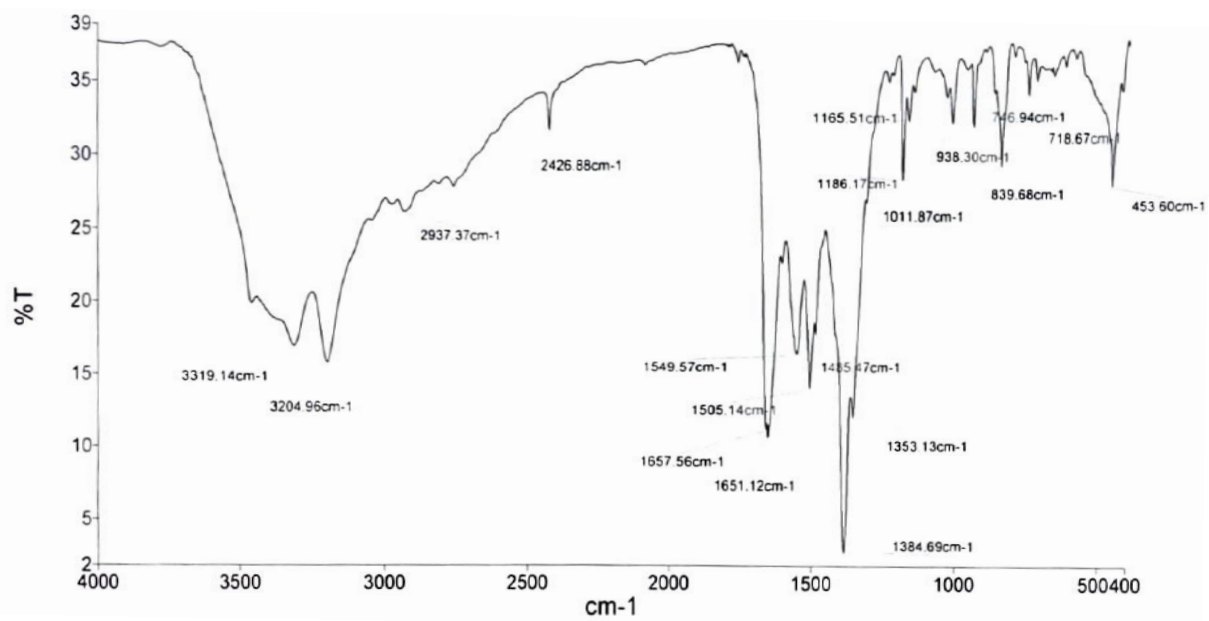

**Fig. S3** FT-IR spectra for (a) H<sub>2</sub>L and (b) Complex 1.

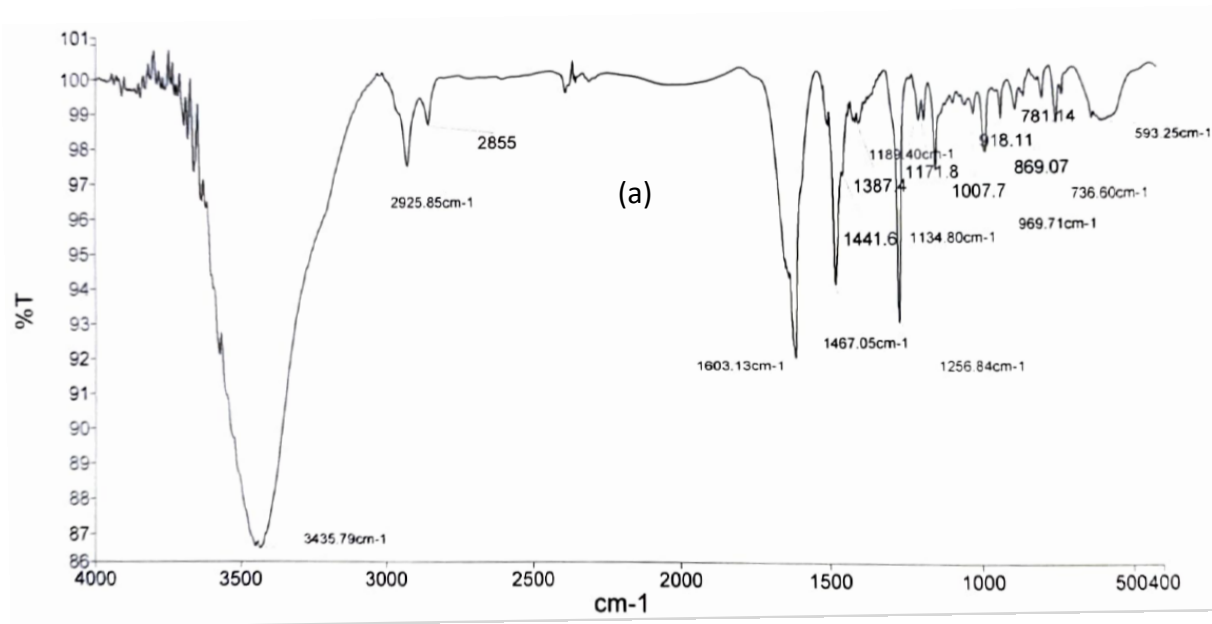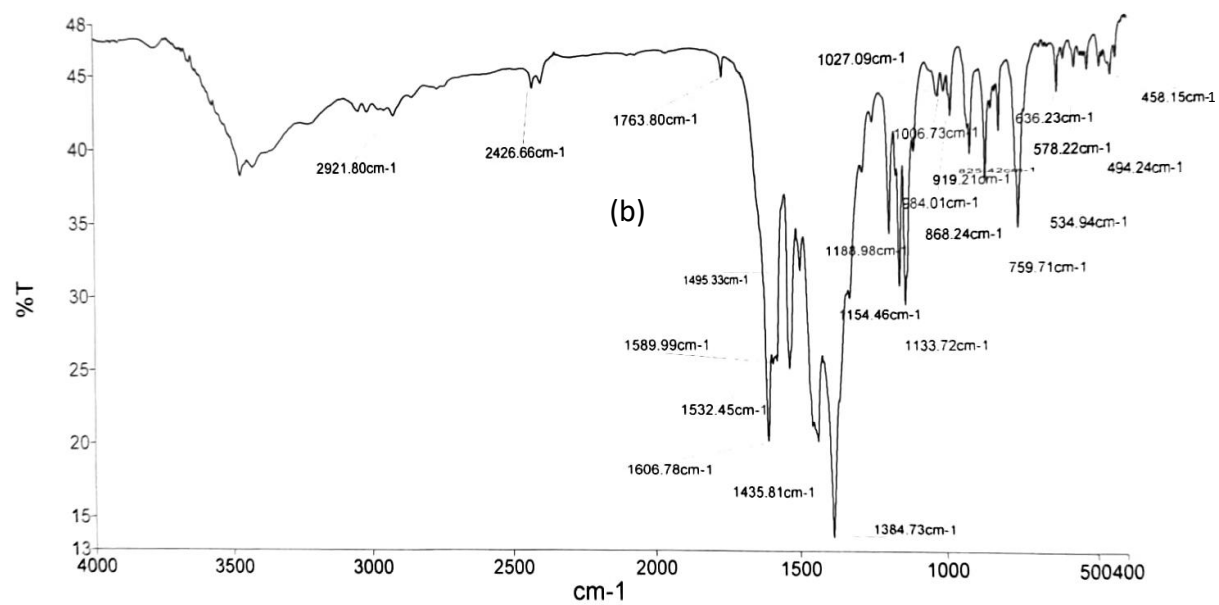

**Fig. S4** FT-IR spectra for (a)  $H_2LM$  and (b) Complex 2.

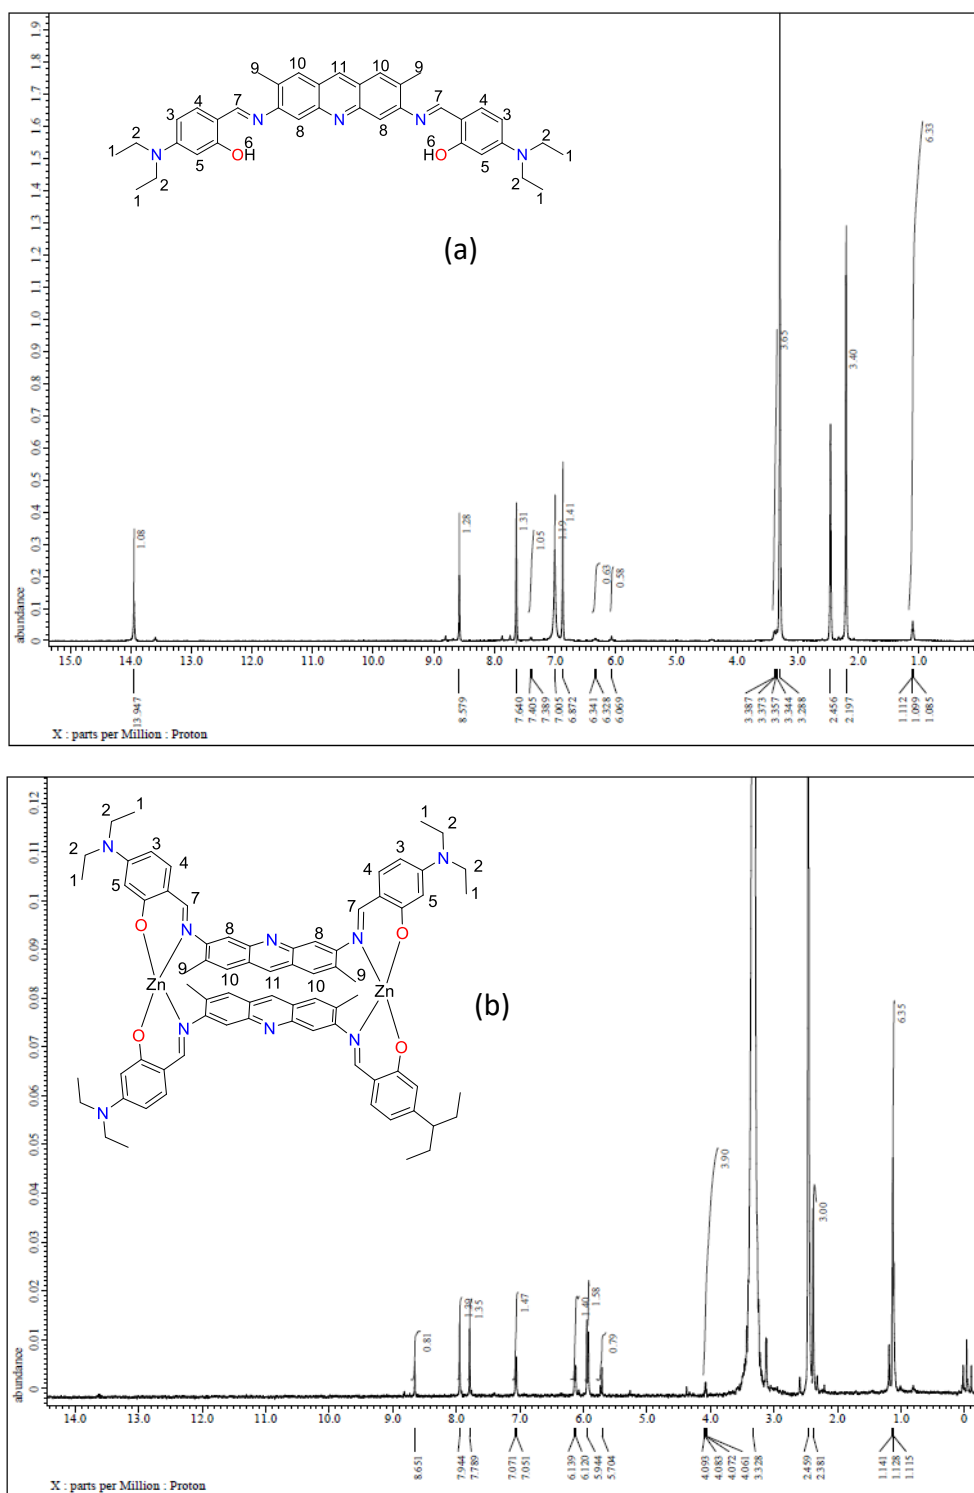

**Fig. S5**  $^1\text{H-NMR}$  ( $\text{DMSO-d}_6$ ) spectra for (a) **H<sub>2</sub>L** and (b) **1** displaying signals for  $-\underline{\text{C}}\underline{\text{H}}=\underline{\text{N}}-$  at  $\delta$ , 8.57 and 8.65 ppm, respectively. The disappearance of signal associated with hydroxyl  $-\underline{\text{O}}\underline{\text{H}}$  ( $\delta$ , 13.94 ppm in **H<sub>2</sub>L**) group substantiated the formation of complex **1** from **H<sub>2</sub>L**.

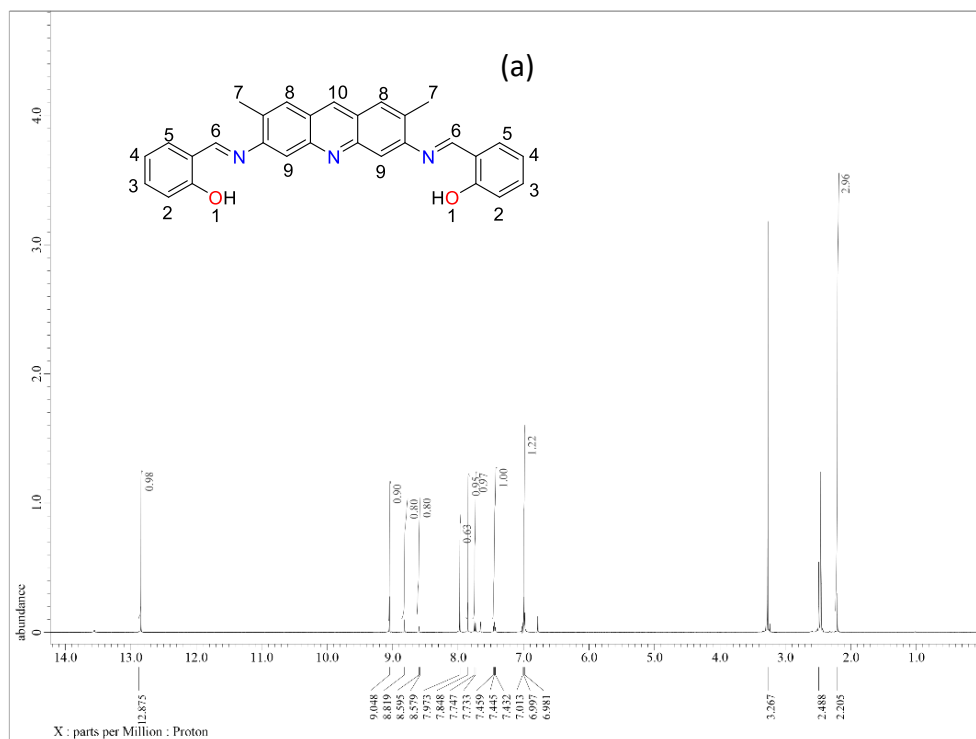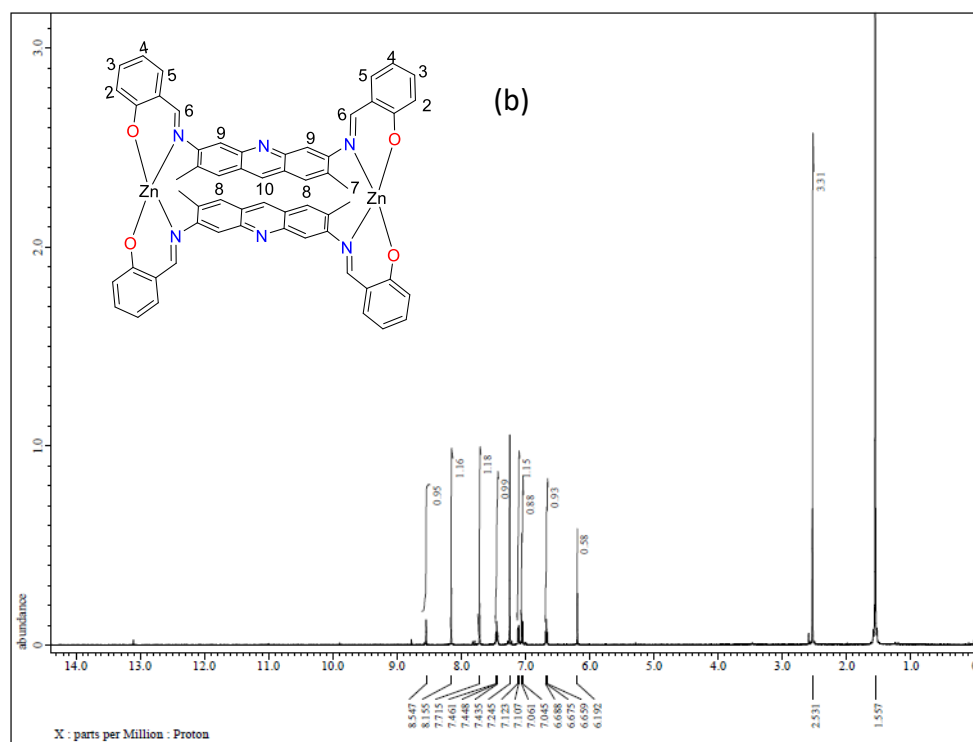

**Fig. S6**  $^1H$ -NMR spectra for (a)  $H_2LM$  ( $DMSO-d_6$ ) and (b) Complex 2 ( $CDCl_3$ ) displaying intact signals for  $-CH=N-$  at  $\delta$ , 9.04 and 8.54 ppm, respectively. The disappearance of signal associated with hydroxyl  $-OH$  ( $\delta$ , 12.87 ppm in  $H_2LM$ ) group substantiated the formation of complex 2 from  $H_2LM$ .

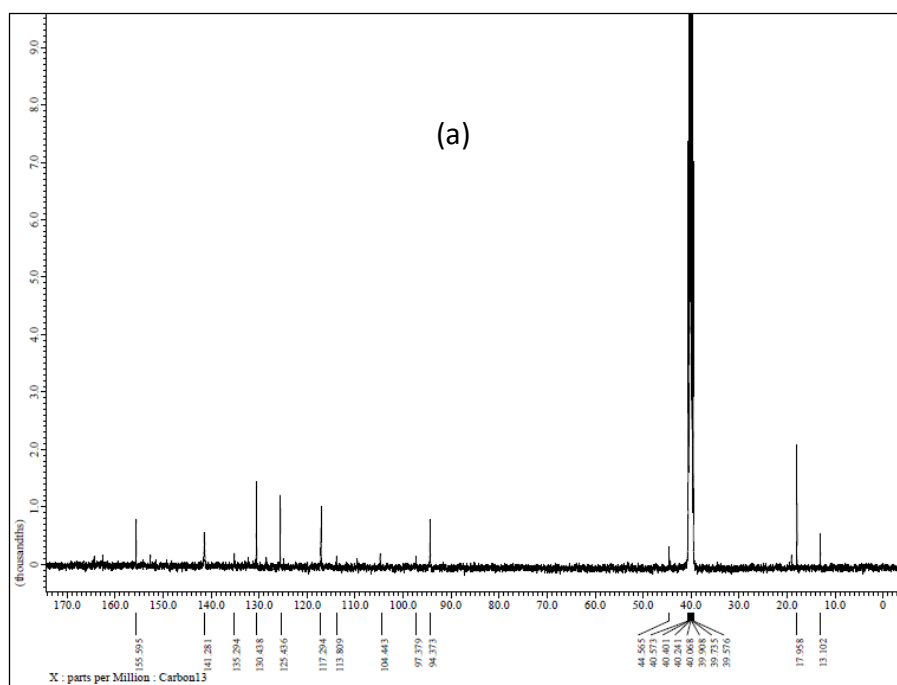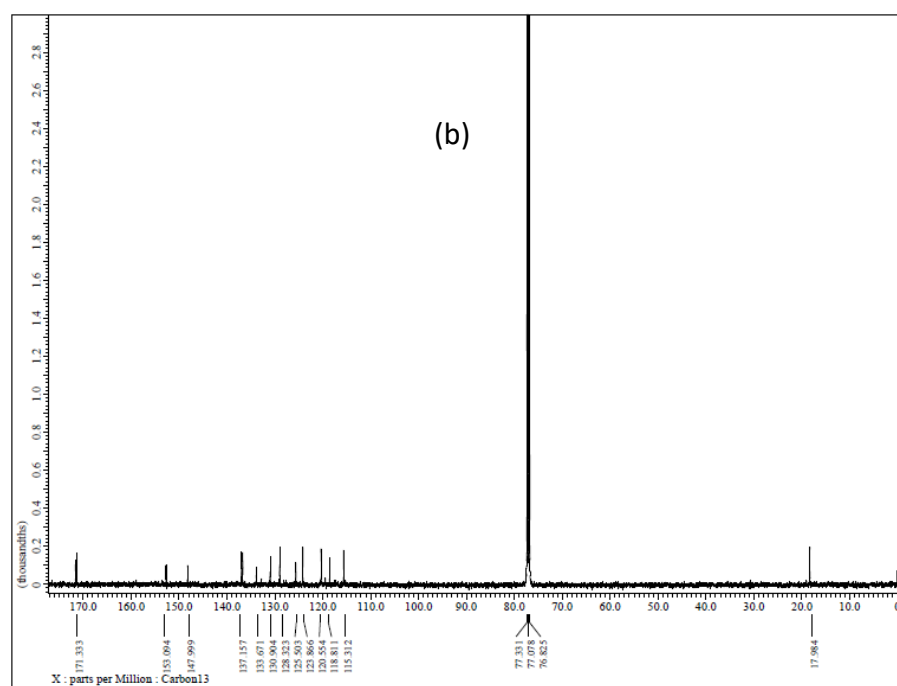

**Fig. S7**  $^{13}\text{C}$ -NMR spectra recorded for (a) **1**  $[(\text{ZnL})_2]$  DMSO- $d_6$  and (b) **2**  $[(\text{ZnL}_M)_2]$  in  $\text{CDCl}_3$ .



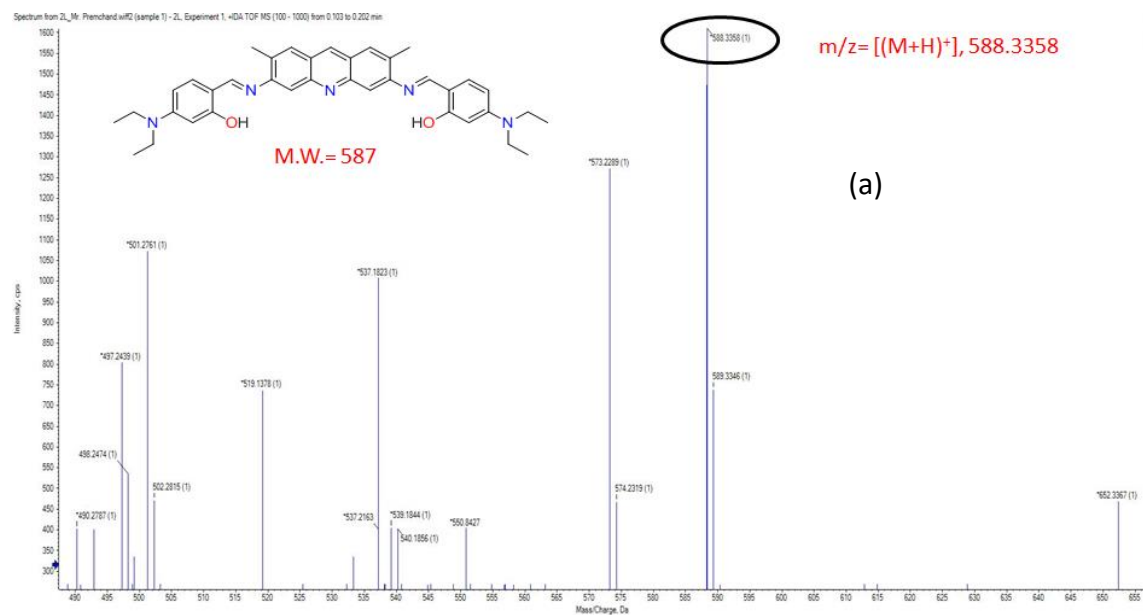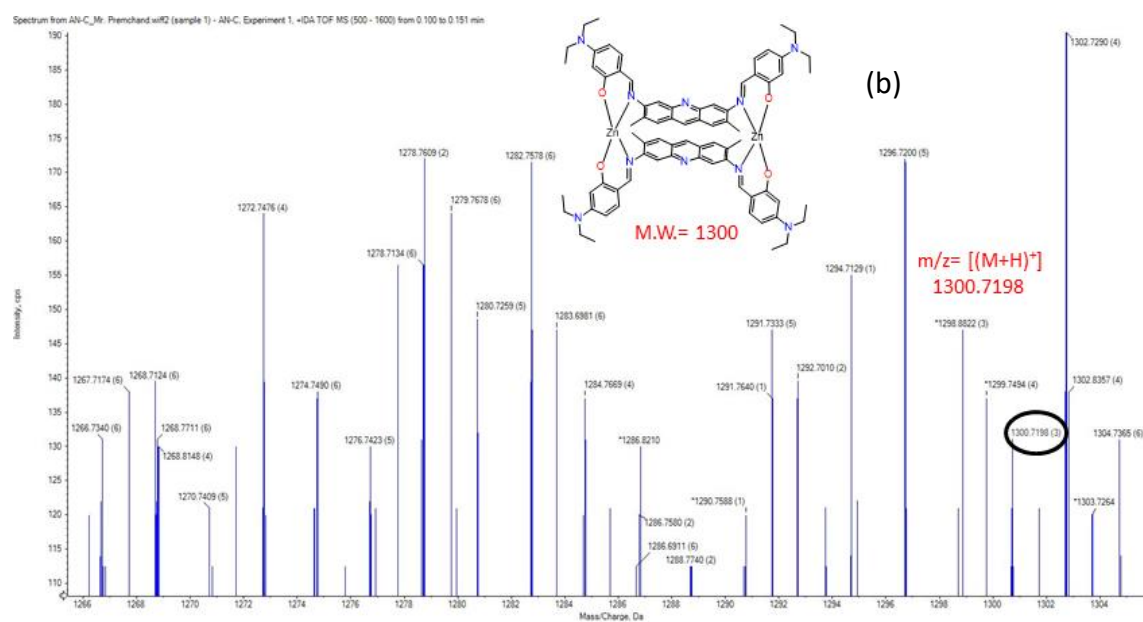

**Fig. S8** ESI-Mass (HRMS-QTOF) spectra obtained for (a) **H<sub>2</sub>L** and (b) **1** [[ZnL]<sub>2</sub>] in positive mode showing molecular ion peaks [M+H]<sup>+</sup> at m/z 588.3358 and 1300.7198, respectively.

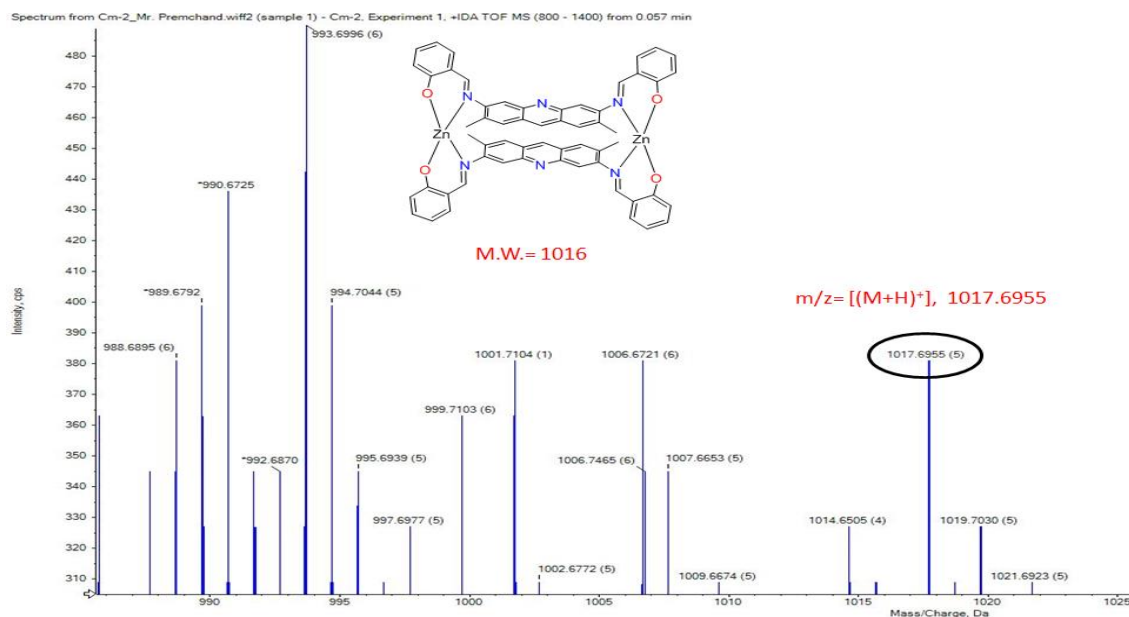

**Fig. S9** ESI-Mass (HRMS-QTOF) spectra obtained for **2**  $[(ZnL_M)_2]$  in positive mode showing molecular ion peak  $[M+H]^+$  at  $m/z$  1017.6955.

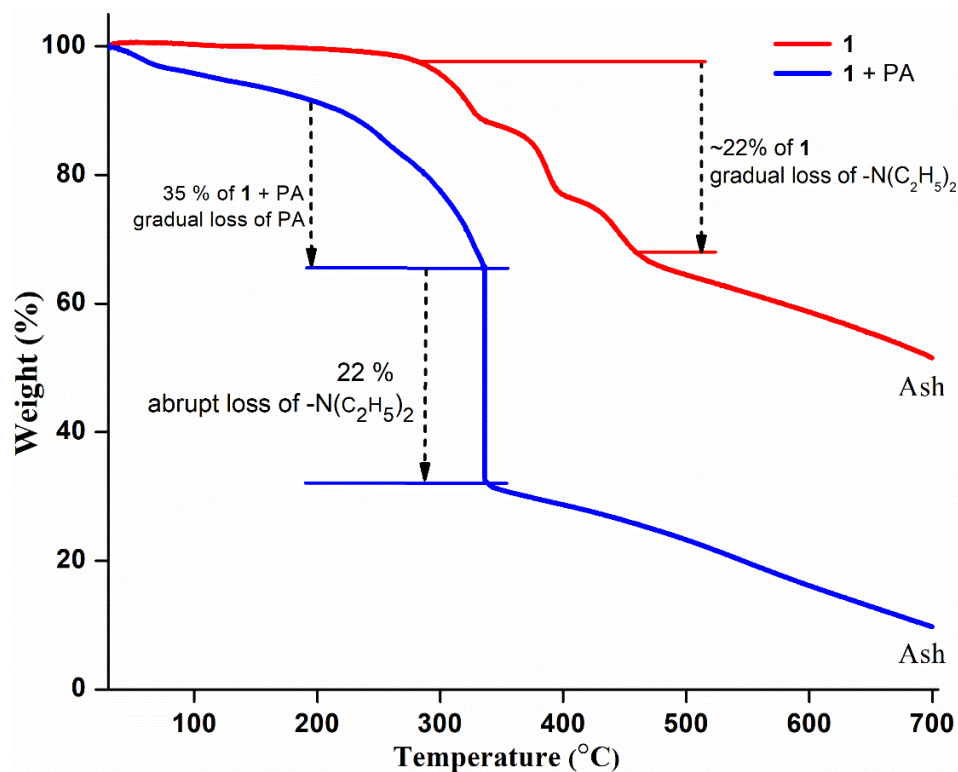

**Fig. S10** TGA analysis of **1** and **(1+PA)**. The red curve displays ~22% weight loss signifying gradual decomposition of N,N-diethyl amine from **1** between 283-456 °C. The blue curve showing ~35% and ~22% weight loss indicating most likely the decomposition multiple PA and N,N-diethyl amine moieties between 180-370 °C.

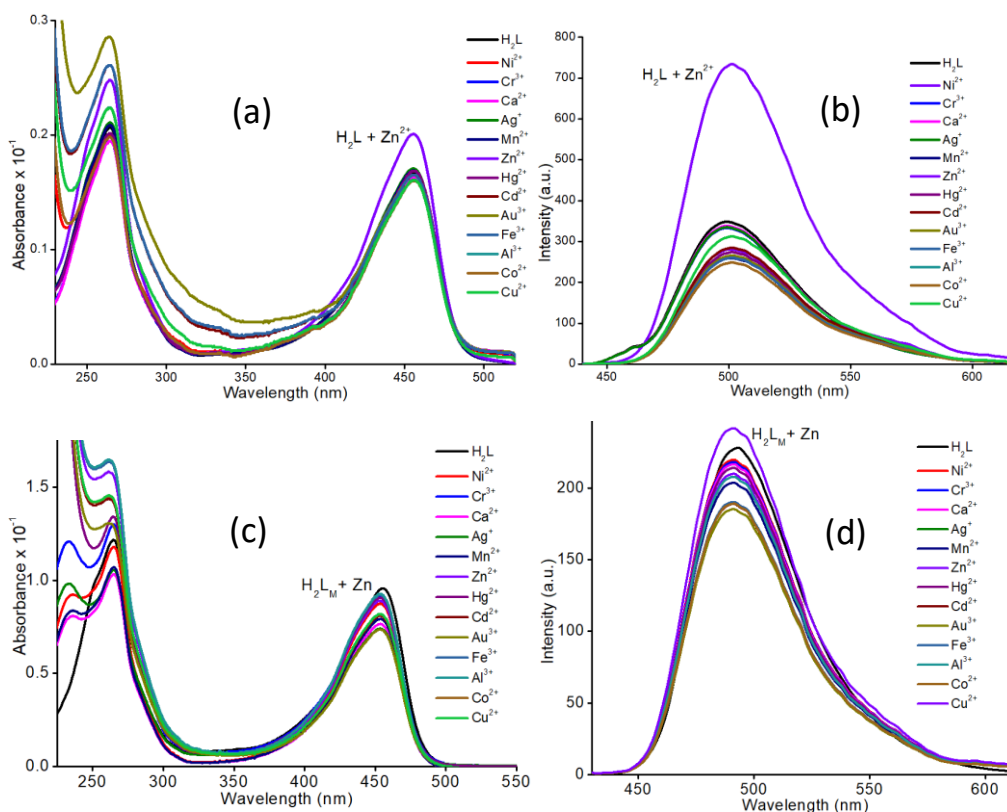

**Fig. S11** (a) UV-vis and (b) Fluorescence spectra for  $\text{H}_2\text{L}$  in presence of  $\text{Ca}^{2+}$ ,  $\text{Cr}^{3+}$ ,  $\text{Mn}^{2+}$ ,  $\text{Fe}^{3+}$ ,  $\text{Co}^{2+}$ ,  $\text{Ni}^{2+}$ ,  $\text{Cu}^{2+}$ ,  $\text{Ag}^+$ ,  $\text{Au}^{3+}$ ,  $\text{Zn}^{2+}$ ,  $\text{Cd}^{2+}$ ,  $\text{Hg}^{2+}$  and  $\text{Al}^{3+}$  signifying that significant changes occur only in presence of  $\text{Zn}^{\text{II}}$  making it most suitable for complex formation. (c) UV-vis and (d) Fluorescence spectra for  $\text{H}_2\text{L}_\text{M}$  in presence of  $\text{Ca}^{2+}$ ,  $\text{Cr}^{3+}$ ,  $\text{Mn}^{2+}$ ,  $\text{Fe}^{3+}$ ,  $\text{Co}^{2+}$ ,  $\text{Ni}^{2+}$ ,  $\text{Cu}^{2+}$ ,  $\text{Ag}^+$ ,  $\text{Au}^{3+}$ ,  $\text{Zn}^{2+}$ ,  $\text{Cd}^{2+}$ ,  $\text{Hg}^{2+}$  and  $\text{Al}^{3+}$ . It displayed no significant change with the metal ions. Only a little fluorescence enhancement was observed with  $\text{Zn}^{\text{II}}$ .

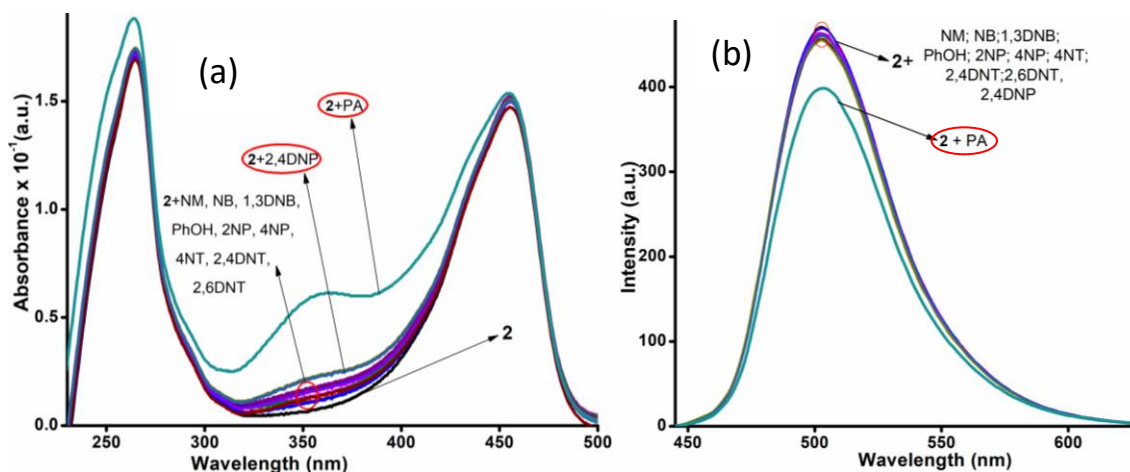

**Fig. S12** (a) UV-vis selectivity experiment for **2** in presence of all NACs which showed negligible change in spectral feature of **2** in presence of all NACs including PA. (b) Insignificant changes in fluorescence spectra for **2** in presence of all NACs including PA. Though, PA offered some moderate alteration in spectra, it was insignificant in comparison to **1**.

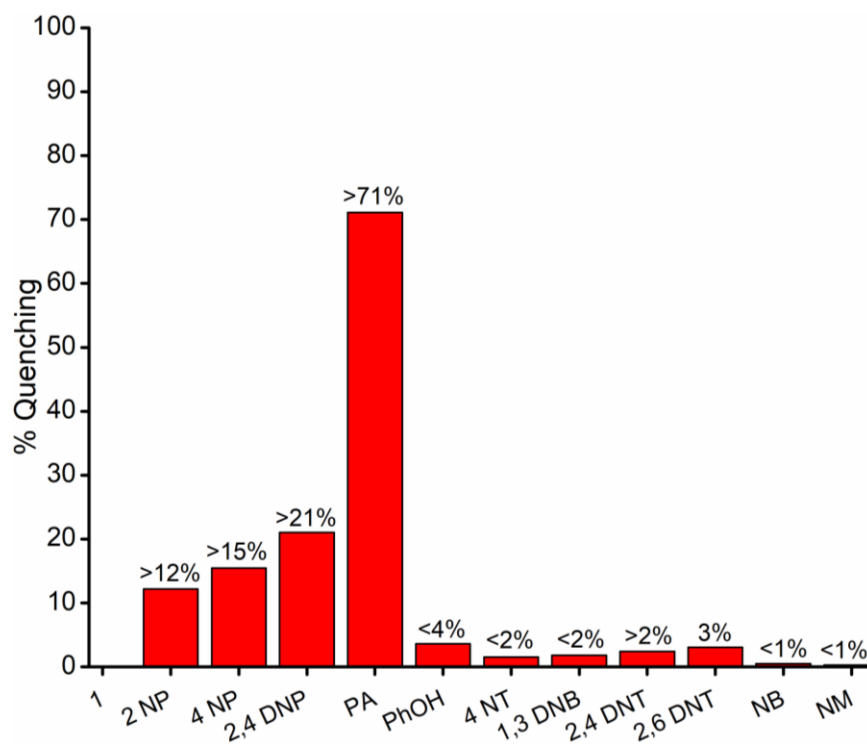

**Fig. S13** Bar diagram showing comparative fluorescence quenching capacities of NACs with **1**. PA shown substantial changes (>71%) among all.

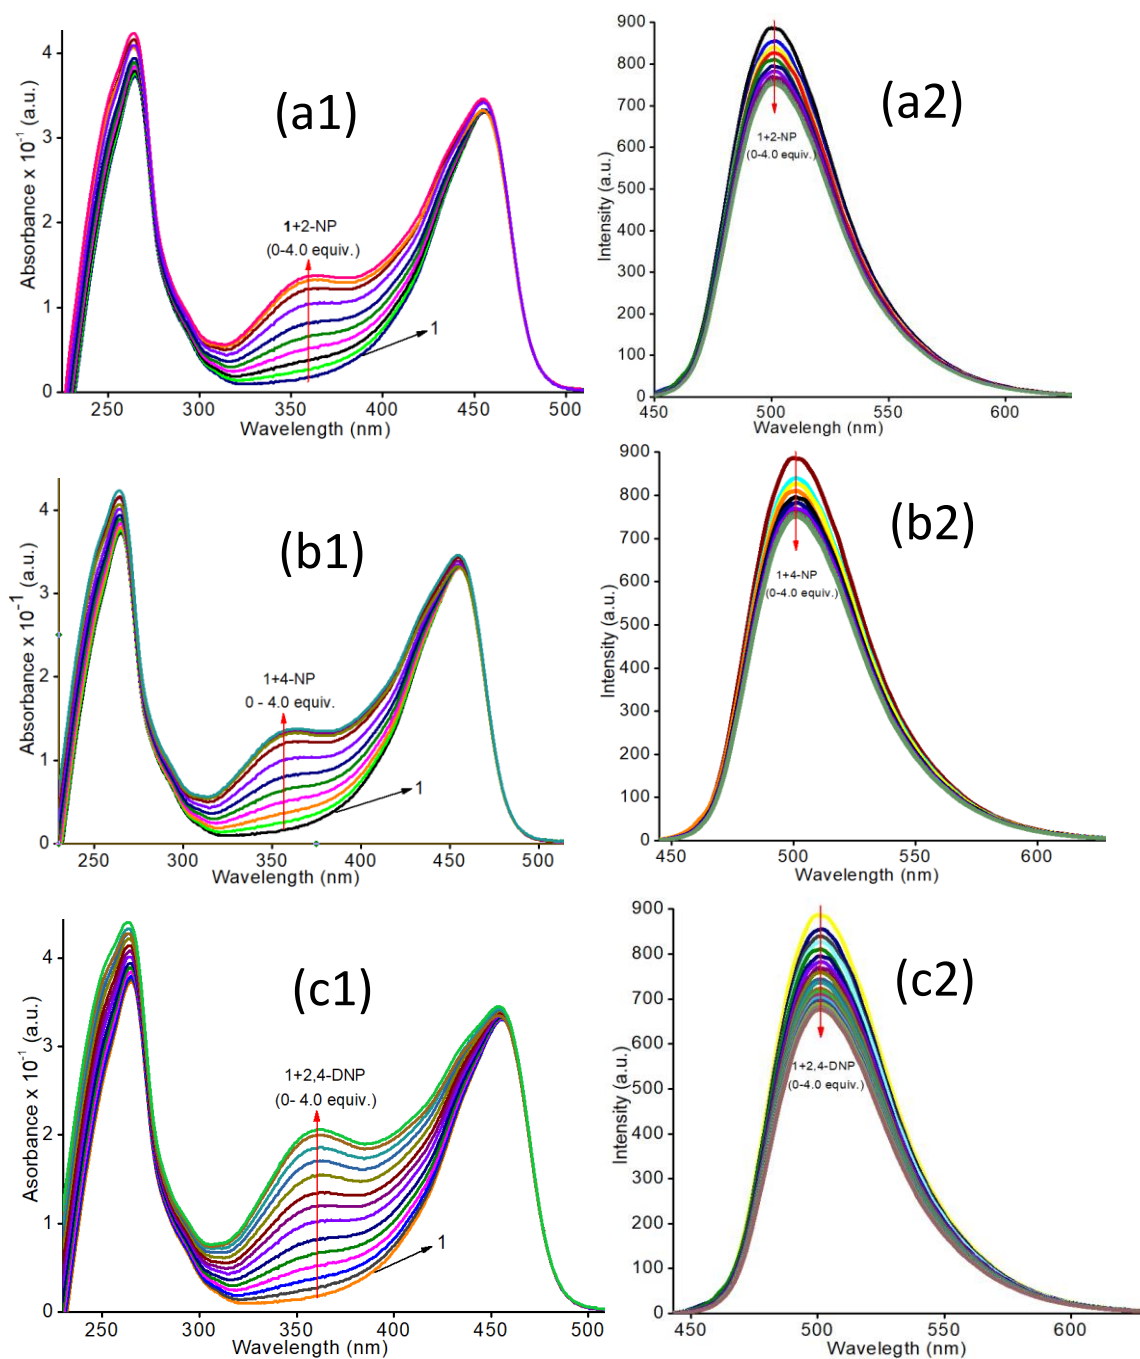

**Fig. S14** (a1) UV-vis and (a2) Fluorescence titration spectral for **1+2-NP**. (b1) UV-vis and (a2) Fluorescence titration spectra for **1+4-NP**. (c1) UV-vis and (c2) Fluorescence titration spectra for **1+2,4-DNP**.

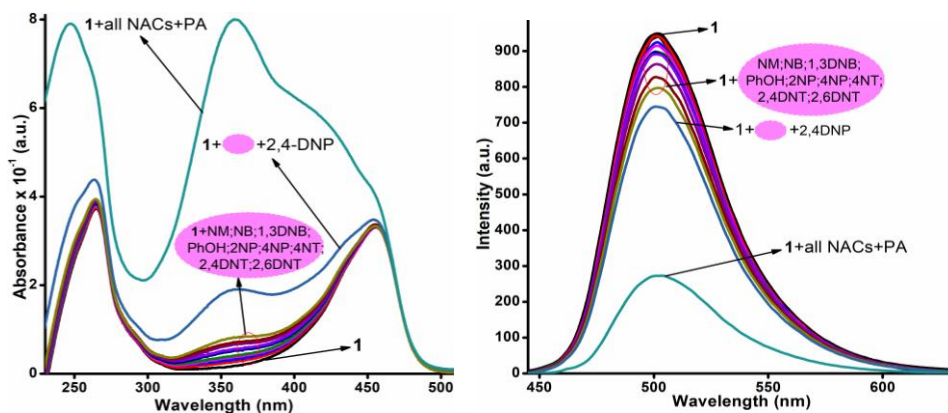

**Fig. S15** UV-vis and fluorescence experiments showing negligible interference in collective presence of all NACs for PA (**1** + all NACs + PA).

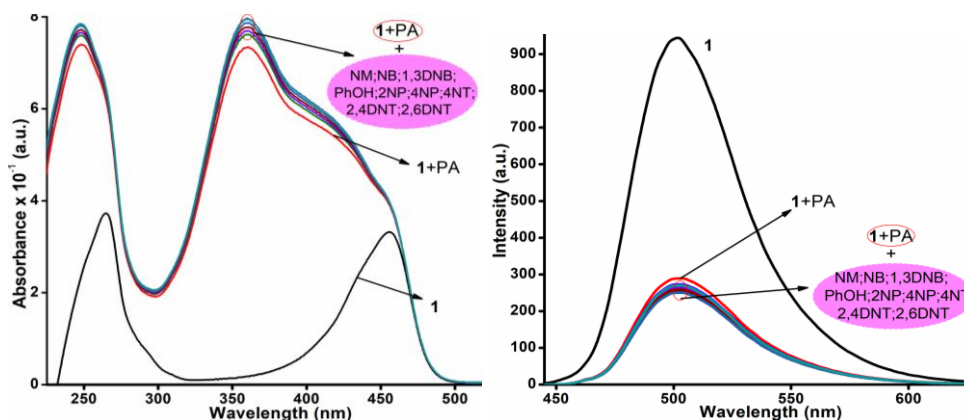

**Fig. S16** UV-vis and fluorescence experiments showing negligible change after addition of PA into **1** due to all NACs (**1** + PA + all NACs).

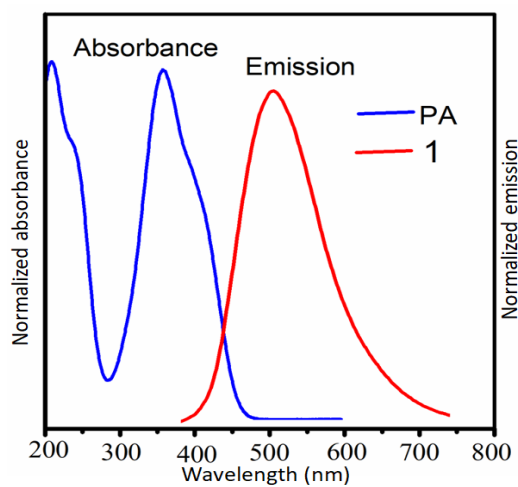

**Fig. S17** Normalized UV-vis spectrum for PA and fluorescence spectrum for **1**.

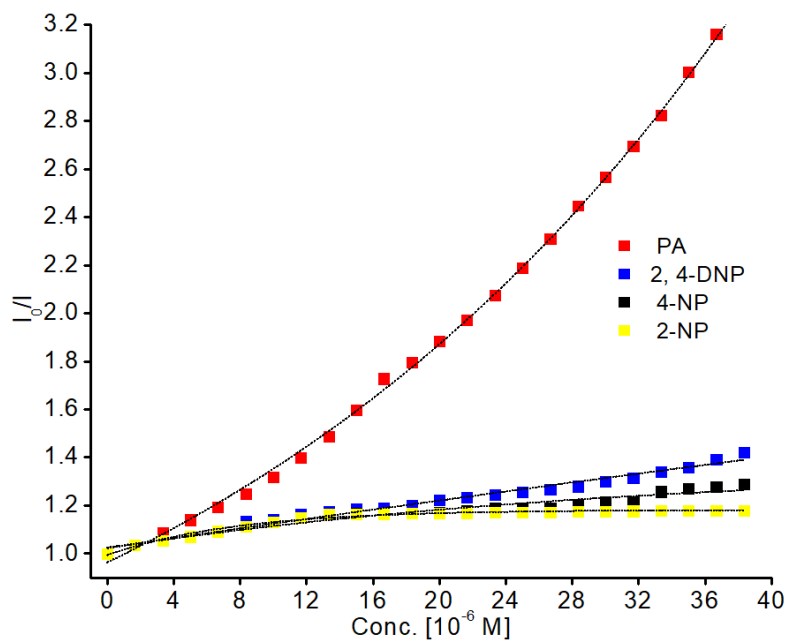

**Fig. S18** Non-linear S-V plots for **1** (c,  $1.0 \times 10^{-5}$  M) in EtOH/H<sub>2</sub>O in presence of PA; 2,4-DNP; 4-NP; and 2-NP between 0 to  $38.33 \times 10^{-5}$  M concentration showing excellent quenching affinities of PA than 2,4-DNP, 4-NP and 2-NP, respectively .

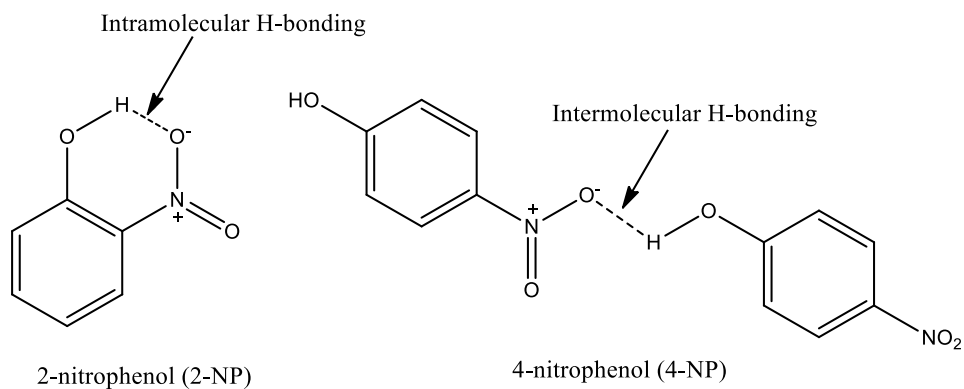

**Fig. S19** Intra and intermolecular H-bonding shown in 2-NP and 4-NP, respectively. The former prevents the availability of phenolic -OH proton more than the latter for interaction with **1**.

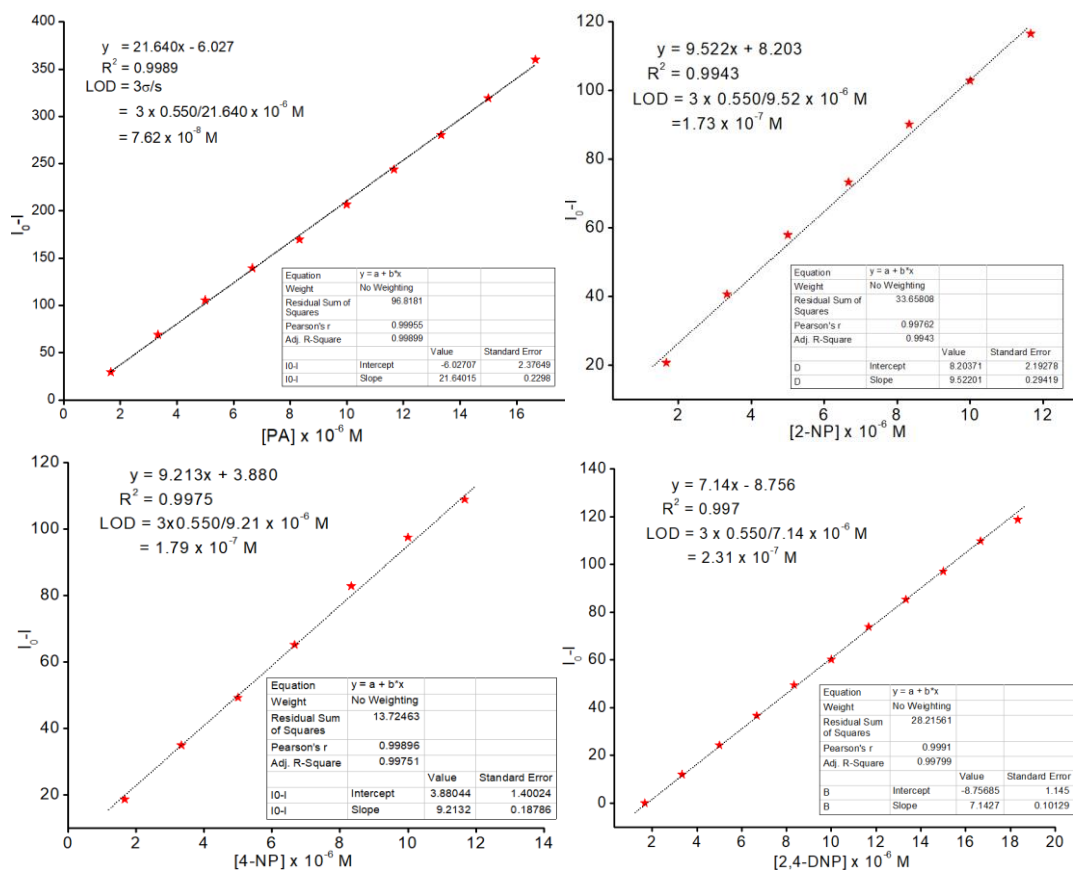

**Fig. S20** LOD calculation of **1** for PA; 2-NP; 4-NP and 2,4-DNP. Linear slope obtained between micro molar concentrations from  $1.66 \times 10^{-6}$  to  $16.7 \times 10^{-6}$  M of the given analytes were plotted as  $l_0-l$  vs conc.

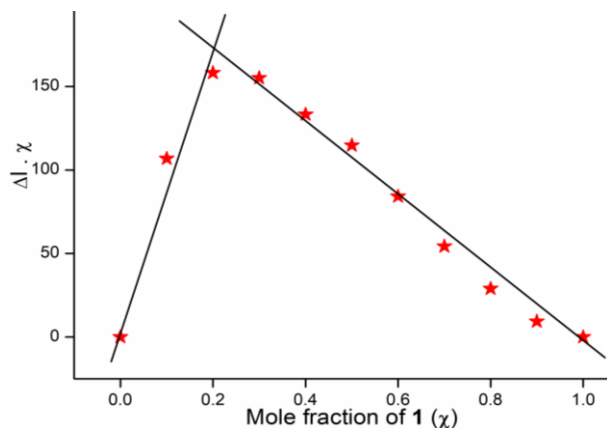

**Fig. S21** Job's plot for determining stoichiometries between **1** and PA which signified a ratio of 1:4 for **1**:PA.



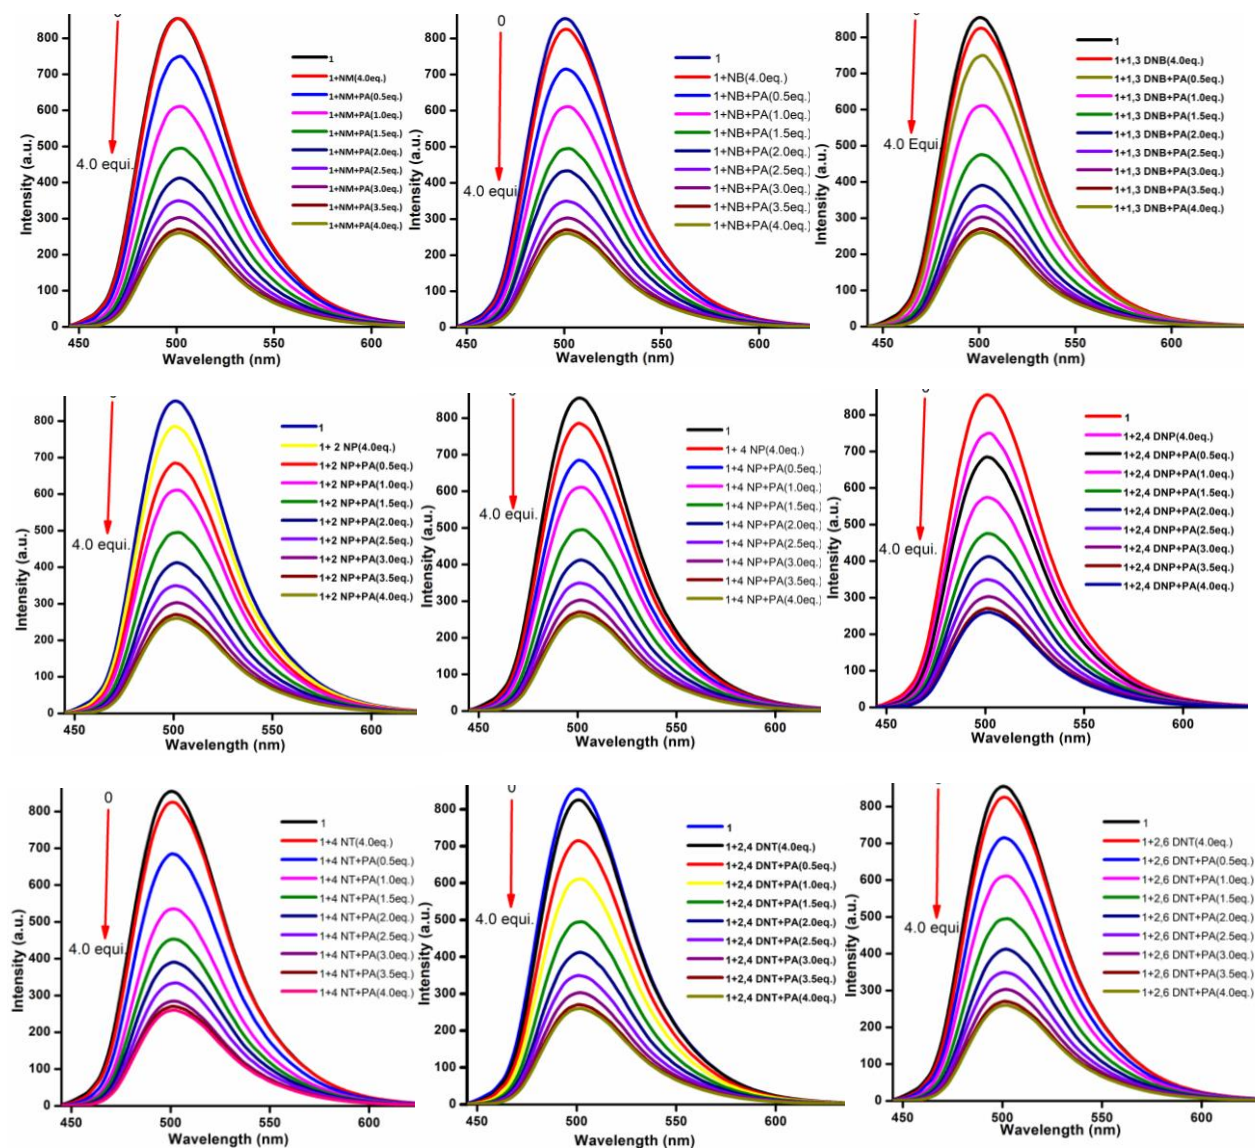

**Fig. S22** Fluorescence spectra of **1** ( $c$ ,  $10^{-5}$  M in EtOH/H<sub>2</sub>O) in presence of various NACs (4.0 equiv. of NM, NB, 1,3-DNB, 2-NP, 4-NP, 2,4-DNP, 4-NT, 2,4-DNT) followed by the incremental addition of PA from 0.5 to 4.0 equiv. Fluorescence intensity for **1** was measured on periodic additions of 'PA' in **1** + individual NACs (4.0 equiv.) to show that the respective NACs caused very small quenching and the severe quenching effect (~90-95%) occurred only after subsequent additions of PA (0.5 to 4.0 equiv.). These actually indicated titration of **1** with PA in presence of fixed amount of NACs (4.0 equiv.) to explore the individual interference effect of all NACs.

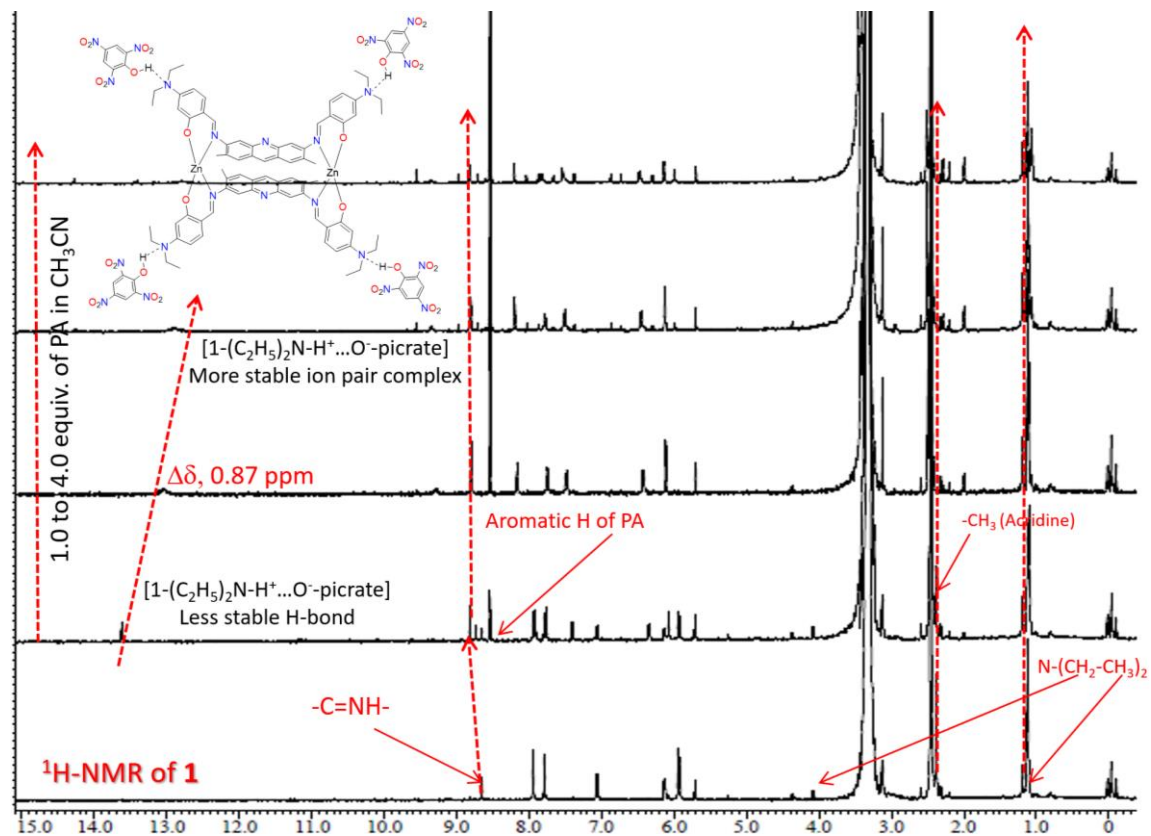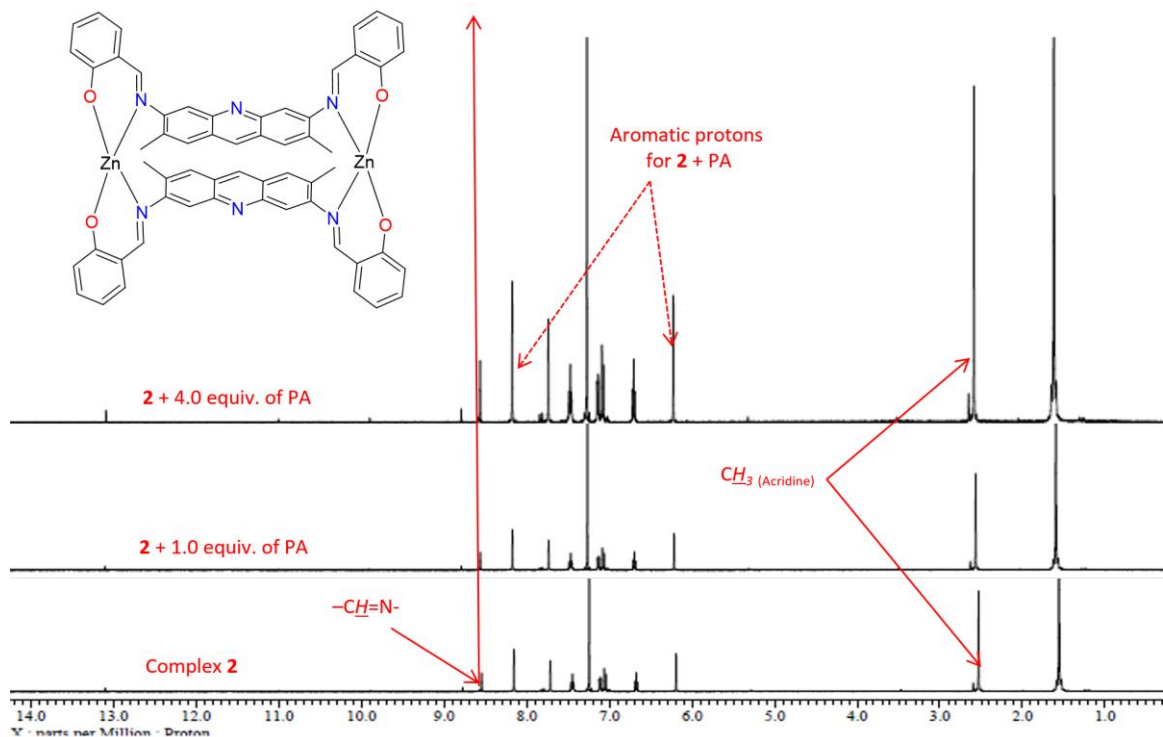

**Fig. S23** Overlay diagram of <sup>1</sup>H-NMR titration spectra for **1** (top) and **2** (bottom) with PA (1.0-4.0 equivalent) showing changes in the spectral features of **1** and **2** on PA

addition.

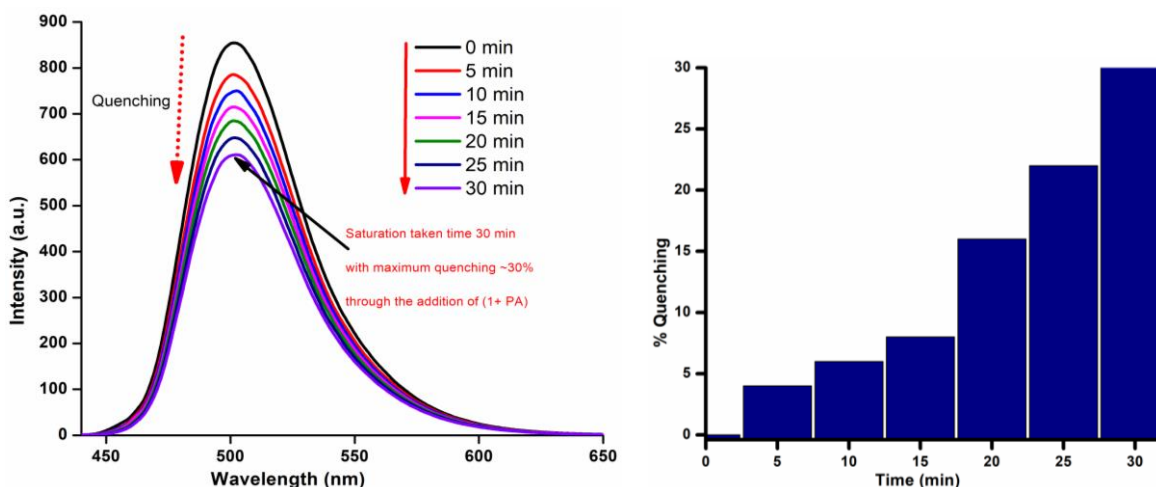

**Fig. S24** Fluorescence titration spectra of **1** recorded in vapour phase detection experiment showcasing the maximum fluorescence quenching of ~29-30 % in **1** achieved in 30 min.

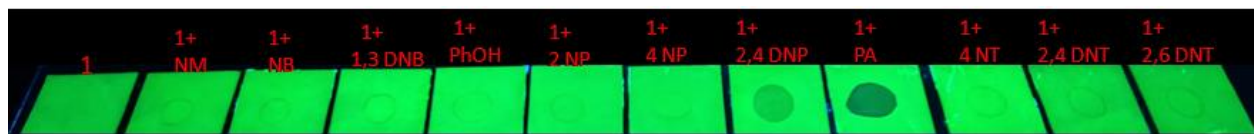

**Fig. S25** Effect of other NACs on solid surface using Whatman filter paper absorbed with probe **1** ( $10^{-5}$  M) in EtOH:H<sub>2</sub>O (1:1) observed under UV-vis, 365 nm. It signified very strong signaling for PA only and a little with 2,4-DNP. All other NACs displayed negligible change.

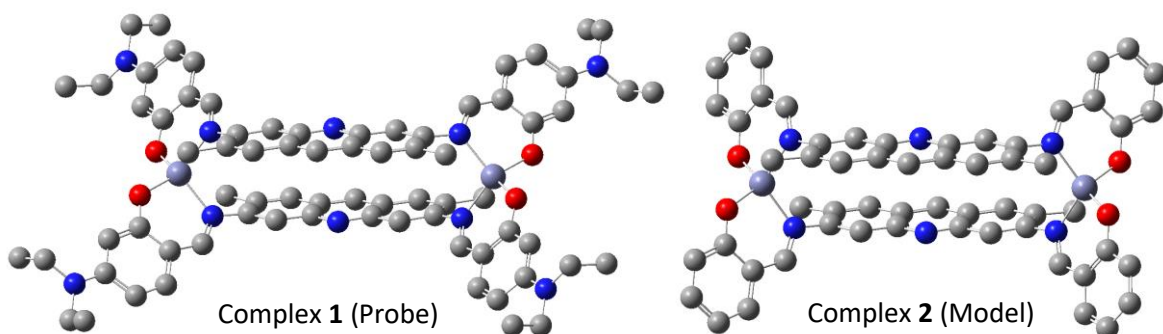

**Fig S26** DFT optimized structure of **1** and **2** which showing tetrahedral geometry around the central atom.

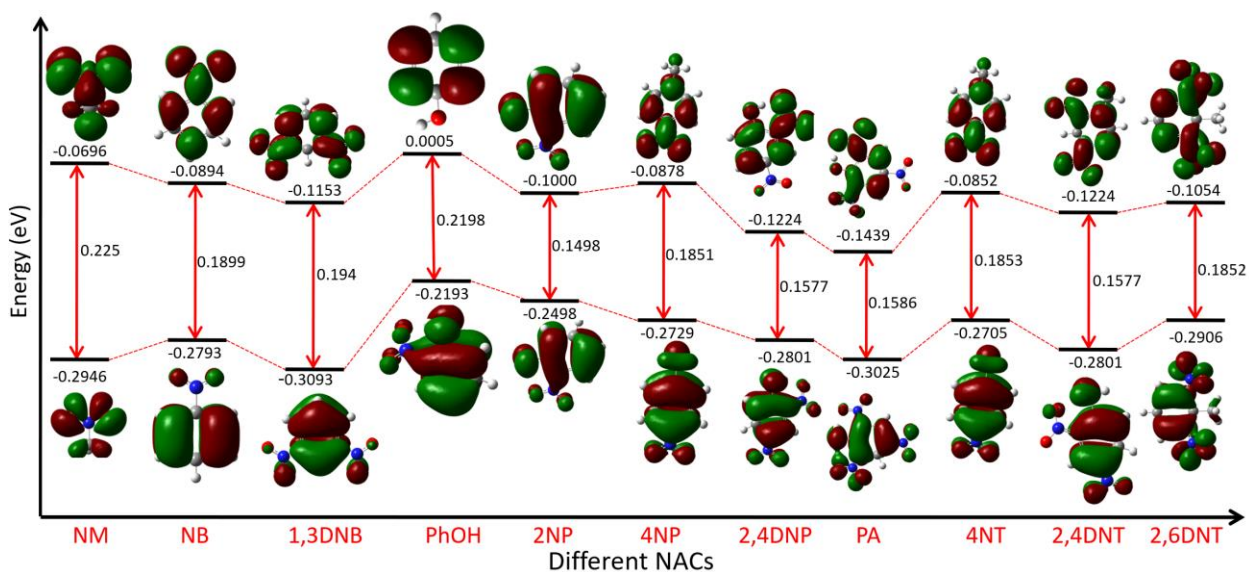

**Fig S27** Diagrammatic representation of DFT optimized HOMO-LUMO energies of all NACs which substantiated that PA exhibits lowest energy in comparison to all NACs that enabled it to interact most with HOMO of **1**.

**Table T1.** Crystallographic data and structural refinement parameters for 1.

|                                   |                                                                                                    |
|-----------------------------------|----------------------------------------------------------------------------------------------------|
| Identification code               | shelxl                                                                                             |
| Empirical formula                 | C <sub>38</sub> H <sub>41</sub> Cl <sub>2</sub> N <sub>5</sub> O <sub>2</sub> Zn                   |
| Formula weight                    | 736.1                                                                                              |
| Temperature                       | 293(2)K                                                                                            |
| Crystal system                    | monoclinic                                                                                         |
| Space group                       | 'P 21/c'                                                                                           |
| Unit cell dimensions              | a = 25.8134(11) Å    α = 90°<br>b = 8.4530(5) Å    β = 105.653(5)°<br>c = 19.2889(10) Å    γ = 90° |
| Volume                            | 4052.76(59) Å <sup>3</sup>                                                                         |
| z                                 | 4                                                                                                  |
| Density (calculated)              | 1.21 Mg/m <sup>3</sup>                                                                             |
| Absorption coefficient            | 0.774 mm <sup>-1</sup>                                                                             |
| F(000)                            | 1536                                                                                               |
| Crystal size                      | 0.20 x 0.10 x 0.05 mm <sup>3</sup>                                                                 |
| Theta range for data collection   | 2.4 to 27.1°                                                                                       |
| Reflections collected             | 35290                                                                                              |
| Independent reflections           | 8301 [R(int) = 0.0734]                                                                             |
| Absorption correction             | Semi-empirical from equivalents                                                                    |
| Max. and min. transmission        | 0.857 and 0.757                                                                                    |
| Refinement method                 | Full-matrix least-squares on F <sup>2</sup>                                                        |
| Data / restraints / parameters    | 8301/0/433                                                                                         |
| Goodness-of-fit on F <sup>2</sup> | 0.935                                                                                              |
| Final R indices [I>2sigma(I)]     | R1 = 0.0693, wR2 = 0.1710                                                                          |
| R indices (all data)              | R1 = 0.1514, wR2 = 0.1959                                                                          |
| Largest peak and deepest hole     | 0.418 and -0.534 e.Å <sup>-3</sup>                                                                 |
| Structure factor coefficient      | Fsqd                                                                                               |

**Table. T2** Selected bond lengths (Å) for **1**

| Atom | Atom | Bond length (Å) | Atom | Atom | Bond length (Å) | Atom | Atom | Bond length (Å) |
|------|------|-----------------|------|------|-----------------|------|------|-----------------|
| Zn1  | O1   | 1.905(3)        | Cl1  | C38  | 1.643(6)        | N5   | C31  | 1.363(5)        |
| Zn1  | O2   | 1.909(3)        | C12  | C15  | 1.523(5)        | N5   | C36  | 1.433(6)        |
| Zn1  | N4   | 2.014(3)        | C28  | C33  | 1.420(5)        | N5   | C34  | 1.492(6)        |
| Zn1  | N2   | 2.016(3)        | C28  | C27  | 1.422(5)        | C9   | C8   | 1.406(6)        |
| O2   | C29  | 1.315(5)        | C8   | C1   | 1.392(5)        | C9   | C10  | 1.408(5)        |
| O1   | C18  | 1.309(5)        | C30  | C31  | 1.382(6)        | C25  | C26  | 1.516(6)        |
| N1   | C2   | 1.353(4)        | C13  | C12  | 1.368(5)        | C29  | C30  | 1.382(5)        |
| N1   | C9   | 1.353(5)        | C13  | C8   | 1.424(5)        | C29  | C28  | 1.414(5)        |
| N2   | C16  | 1.312(5)        | C21  | C22  | 1.344(6)        | C34  | C35  | 1.471(7)        |
| N2   | C4   | 1.429(5)        | C7   | C6   | 1.409(5)        | C17  | C16  | 1.398(6)        |
| N4   | C27  | 1.310(5)        | C32  | C33  | 1.342(5)        | C2   | C3   | 1.425(5)        |
| N4   | C11  | 1.415(5)        | C32  | C31  | 1.421(6)        | C4   | C3   | 1.383(5)        |
| N3   | C20  | 1.352(5)        | Cl2  | C38  | 1.730(7)        | C4   | C5   | 1.409(6)        |
| N3   | C25  | 1.450(5)        | C23  | C24  | 1.489(6)        | C19  | C20  | 1.409(6)        |
| N3   | C23  | 1.491(6)        | C7   | C1   | 1.389(5)        | C5   | C6   | 1.359(5)        |
| C11  | C10  | 1.374(5)        | C17  | C22  | 1.418(5)        | C36  | C37  | 1.513(7)        |
| C11  | C12  | 1.421(6)        | C17  | C18  | 1.434(5)        | C2   | C7   | 1.415(6)        |

**Table. T3** Selected bond angles (Å) for **1**

| Atom | Atom | Atom | Angles<br>[°] | Atom | Atom | Atom | Angles<br>[°] | Atom | Atom | Atom | Angles<br>[°] |
|------|------|------|---------------|------|------|------|---------------|------|------|------|---------------|
| O1   | Zn1  | O2   | 102.61(12)    | C16  | C17  | C22  | 116.6(4)      | C31  | N5   | C36  | 121.6(4)      |
| O1   | Zn1  | N4   | 130.29(14)    | C16  | C17  | C18  | 126.8(4)      | C31  | N5   | C34  | 121.4(4)      |
| O2   | Zn1  | N4   | 97.37(13)     | C22  | C17  | C18  | 116.5(4)      | C36  | N5   | C34  | 116.6(4)      |
| O1   | Zn1  | N2   | 97.16(13)     | C18  | C19  | C20  | 123.8(4)      | N1   | C9   | C8   | 123.1(4)      |
| O2   | Zn1  | N2   | 130.12(14)    | C6   | C5   | C4   | 118.9(4)      | N1   | C9   | C10  | 118.1(4)      |
| N4   | Zn1  | N2   | 103.74(12)    | C6   | C5   | C14  | 120.2(4)      | C8   | C9   | C10  | 118.8(4)      |
| C29  | O2   | Zn1  | 125.8(3)      | C4   | C5   | C14  | 120.9(4)      | C11  | C10  | C9   | 121.5(4)      |
| C18  | O1   | Zn1  | 126.5(3)      | N3   | C20  | C19  | 121.9(4)      | C11  | C38  | C12  | 114.4(4)      |
| C2   | N1   | C9   | 116.8(4)      | N3   | C20  | C21  | 121.4(4)      | C4   | C3   | C2   | 120.8(4)      |
| C16  | N2   | C4   | 119.1(3)      | C19  | C20  | C21  | 116.8(4)      | O2   | C29  | C30  | 118.6(4)      |
| C16  | N2   | Zn1  | 118.0(3)      | C12  | C13  | C8   | 121.7(4)      | O2   | C29  | C28  | 122.6(3)      |
| C4   | N2   | Zn1  | 121.5(3)      | C13  | C12  | C11  | 119.0(4)      | O1   | C18  | C17  | 122.0(4)      |
| C27  | N4   | C11  | 117.5(3)      | C13  | C12  | C15  | 119.3(4)      | C19  | C18  | C17  | 118.8(4)      |
| C27  | N4   | Zn1  | 118.6(3)      | C11  | C12  | C15  | 121.7(4)      | C7   | C1   | C8   | 119.8(4)      |
| C11  | N4   | Zn1  | 121.8(3)      | C1   | C7   | C6   | 123.2(4)      | C22  | C21  | C20  | 120.2(4)      |
| C20  | N3   | C25  | 122.1(4)      | C1   | C7   | C2   | 117.5(4)      | N2   | C16  | C17  | 129.0(4)      |
| C20  | N3   | C23  | 122.3(4)      | C6   | C7   | C2   | 119.3(4)      | C35  | C34  | N5   | 111.8(5)      |
| C25  | N3   | C23  | 115.3(4)      | C5   | C6   | C7   | 122.4(4)      | N5   | C36  | C37  | 113.2(5)      |
| C10  | C11  | N4   | 121.9(4)      | C29  | C28  | C33  | 116.4(4)      | C32  | C33  | C28  | 123.9(4)      |
| C10  | C11  | C12  | 120.1(4)      | C9   | C8   | C13  | 118.9(4)      | C21  | C22  | C17  | 123.8(4)      |
| N4   | C11  | C12  | 118.0(4)      | C31  | C30  | C29  | 124.2(4)      | N4   | C27  | C28  | 127.5(4)      |
| N1   | C2   | C7   | 124.1(4)      | C33  | C32  | C31  | 119.8(4)      | C30  | C29  | C28  | 118.8(4)      |
| N1   | C2   | C3   | 118.0(4)      | C1   | C8   | C9   | 118.7(4)      | C5   | C4   | N2   | 120.0(3)      |
| C7   | C2   | C3   | 117.9(3)      | C1   | C8   | C13  | 122.4(4)      | O1   | C18  | C19  | 119.2(4)      |
| C3   | C4   | C5   | 120.7(4)      | C29  | C28  | C27  | 127.4(4)      | C33  | C28  | C27  | 116.2(4)      |
| C3   | C4   | N2   | 119.2(4)      |      |      |      |               |      |      |      |               |

**Table T4.** Comparison of  $K_{SV}$  and LOD for PA detection by **1** with other reported systems.

| S. No | Chemo-sensor                                                                                        | Solvent                  | Analyte                                               | $K_{S-V} (M^{-1})$ | Limit of detection (LOD, M) | Ref       |
|-------|-----------------------------------------------------------------------------------------------------|--------------------------|-------------------------------------------------------|--------------------|-----------------------------|-----------|
| 1     | naphthylvinylpyridine Ligand in Zn(II)/Cd(II)                                                       | ACN                      | Only PA                                               | $6.34 \times 10^4$ | $7.2 \times 10^{-7}$        | 5         |
| 2     | hexaphenyl-benzene derivative                                                                       | THF/water                | Only PA                                               | $1.95 \times 10^5$ | $6.87 \times 10^{-9}$       | 6         |
| 3     | carbazole-N,N-dimethylaniline                                                                       | DMSO/water               | Only PA                                               | $1.01 \times 10^7$ | $7.84 \times 10^{-8}$       | 7         |
| 4     | dimethylamino)-phenyl)diazenyl)-N-(thiophen-2-ylmethyl)benzenesulfonamide                           | CH <sub>3</sub> CN       | Only PA                                               | $1.35 \times 10^4$ | $1.48 \times 10^{-5}$       | 8         |
| 5     | tetraphenylethylene (TPE)                                                                           | water                    | PA against TNT and DNT                                | $5.7 \times 10^4$  | $1.45 \times 10^{-9}$       | 9         |
| 6     | 2-hydroxyphenyl benzimidazoles                                                                      | THF/water                | Only PA                                               | -                  | $8.33 \times 10^{-7}$       | 10        |
| 7     | Cz-4-CF <sub>3</sub> and Cz-4-CH <sub>3</sub>                                                       | water                    | Only PA                                               | -                  | $5.14 \times 10^{-8}$       | 11        |
| 8     | tris dimethyl-aminophenyl-benzene                                                                   | CH <sub>3</sub> CN/water | PA, TNT, DNT, m-DNB and p-DNB                         | $3.87 \times 10^5$ | $1.5 \times 10^{-6}$        | 12        |
| 9     | 1,8-naphthalimide                                                                                   | DMSO/water               | Only PA                                               | $2.27 \times 10^7$ | $3.0 \times 10^{-9}$        | 13        |
| 10    | hydrazono-sulfonamide                                                                               | THF/water                | Only PA                                               | $1.0 \times 10^5$  | $0.08 \times 10^{-6}$       | 14        |
| 11    | 2-(4-aminophenyl)-3-(3-(4,5-diphenyl-1H-imidazol-2-yl)-2-hydroxyphenyl)acrylonitrile (ADHA)         | THF/water                | Only PA                                               | $4.41 \times 10^5$ | $6.26 \times 10^{-9}$       | 15        |
|       | 2,6-Pyridine-bis-(iminoantipyrine) (PyBAP)                                                          |                          | Related to single crystal XRD                         |                    |                             | 16        |
| 12    | 4-(diphenyl-amino)-2-hydroxybenzaldehyde                                                            | THF/water                | Sensing related to Zn <sup>2+</sup> /Cd <sup>2+</sup> | -                  | -                           | 17        |
| 13    | N,N'-di(Octyl)-Perylene-3,4,9,10-Tetracarboxylicbisimide (PDI-4)                                    | DMF                      | Fluorescence quenching                                | -                  |                             | 18        |
| 14    | tetraphenylethylene                                                                                 | water                    | Only PA                                               | $2.7 \times 10^5$  | $0.4 \times 10^{-6}$        | 19        |
| 15    | Zn <sup>II</sup> -metallacycle (complex <b>1</b> ) [(ZnL) <sub>2</sub> ] based on acridine yellow G | EtOH/H <sub>2</sub> O    | Only PA                                               | $3.44 \times 10^4$ | $7.62 \times 10^{-8}$       | This work |



## References;

- (1) Ö. K. Koç, A. Üzer and R. Apak, *ACS Appl. Nano Mater.*, 2022, **5**, 5868–5881.
- (2) D. Nagaraj, R. M. Melavanki, N. R. Patil and R. A. Kusanur, *Spectrochim. Acta A Mol. Biomol. Spectrosc.*, 2014, **130**, 122-128.
- (3) A. S. Tanwar, S. Patidar, S. Ahirwar, S. Dehingia and P. K. Iyer, *Analyst*, 2019, **144**, 669–676.
- (4) S. Yi, H. Li and X. Liu, *RSC Adv.*, 2022, **12**, 10915-10923.
- (5) B. Dutta, A. Hazra, S. Datta, C. Sinha, P. Banerjee, and M. H. Mir, *ACS Appl. Polym. Mater.* 2022, **4**, 2841–2850.
- (6) V. Bhalla, S. Kaur, V. Vij and M. Kumar, *Inorg. Chem.*, 2013, **52**, 4860-4865.
- (7) D. B. C. Leslee and S. Karuppannan, *J. Photochem. Photobiol. A*, 2022, **429**, 113937.
- (8) P. Kumar, D. Arya, D. Nain, A. Singh, A. Ghosh and D. A. Jose, *Dyes Pigm.*, 2019, **166**, 443-450.
- (9) D. Li, J. Liu, R. T. K. Kwok, Z. Liang, B. Z. Tang and J. Yu, *Chem. Commun.*, 2012, **48**, 7167-7169.
- (10) R. Arumugam, P. Nayak, B. Dey, R. Kannan, K. Venkatasubbaiah and V. Chandrasekhar, *Dalton Trans.*, 2023, **52**, 7926-7935.
- (11) P. Gayathri, S. Ravi, P. Nantheeswaran, M. Mariappan, S. Karthikeyan, M. Pannipara, A. G. Al-Sehemi, D. Moon and S. P. Anthony, *Mol. Syst. Des. Eng.*, 2022, **7**, 1277-1286.
- (12) P. Vishnoi, S. Sen, G. N. Patwari and R. Murugavel, *New J. Chem.*, 2015, **39**, 886-892.
- (13) A. Kumar and P. S. Chae, *Sens. Actuators B: Chem.*, 2017, **240**, 1-9.
- (14) S. Dhiman, N. Singla, M. Ahmad, P. Singh and S. Kumar, *Mater. Adv.*, 2021, **2**, 6466-6498.
- (15) S. M. Kumar and S. K. Iyer, *Sens. and Actuators Rep.*, 2023, **6**, 100177.
- (16) J. Pitchaimani, A. Kundu, S. Karthikeyan, S. P. Anthony, D. Moon and V. Madhu, *CrystEngComm*, 2017, **19**, 3557-3561.
- (17) P.S. Hariharan, S. P. Anthony, *Anal. Chim. Acta*, 2014, **848**, 74-79.
- (18) P. S. Hariharan, J. Pitchaimani, V. Madhu and S. P. Anthony, *J. Fluoresc.*, 2016, **26**, 395–401.
- (19) H.T. Feng and Y. S. Zheng, *Chem. Eur. J.*, 2013, **20**, 195-201.
